# Supplementary material for: Identification of the global regulatory roles of RraA via the integrative transcriptome and proteome in Vibrio alginolyticus
Source: PubMed Central journal article supplement (PMC11288022; doi:10.1128/msphere.00020-24), 2024-06-27
Supplement: msphere.00020-24-s0001.pdf [file msphere.00020-24-s0001.pdf]

**Figure S1** Amino acid sequence percent identity matrix of *rraA* in various bacteria

|             |        |        |        |        |        |        |        |        |        |        |        |
|-------------|--------|--------|--------|--------|--------|--------|--------|--------|--------|--------|--------|
| 1: EcRraA   | 100.00 | 97.52  | 68.94  | 65.84  | 54.66  | 43.48  | 38.75  | 44.16  | 43.75  | 26.71  | 26.71  |
| 2: StRraA   | 97.52  | 100.00 | 68.94  | 65.84  | 54.04  | 43.48  | 37.50  | 44.16  | 43.12  | 26.09  | 26.09  |
| 3: VvRraAV1 | 68.94  | 68.94  | 100.00 | 86.90  | 57.41  | 39.52  | 41.88  | 42.21  | 48.78  | 24.86  | 24.86  |
| 4: VaRraA   | 65.84  | 65.84  | 86.90  | 100.00 | 58.02  | 39.51  | 41.25  | 41.56  | 43.83  | 23.81  | 23.81  |
| 5: PaRraA   | 54.66  | 54.04  | 57.41  | 58.02  | 100.00 | 48.77  | 46.25  | 43.51  | 42.24  | 29.01  | 29.01  |
| 6: VcRraA   | 43.48  | 43.48  | 39.52  | 39.51  | 48.77  | 100.00 | 76.69  | 45.51  | 39.26  | 21.84  | 21.84  |
| 7: VvRraAV2 | 38.75  | 37.50  | 41.88  | 41.25  | 46.25  | 76.69  | 100.00 | 42.68  | 40.88  | 22.35  | 22.02  |
| 8: MtRraA   | 44.16  | 44.16  | 42.21  | 41.56  | 43.51  | 45.51  | 42.68  | 100.00 | 45.75  | 31.85  | 31.41  |
| 9: TtRraA   | 43.75  | 43.12  | 48.78  | 43.83  | 42.24  | 39.26  | 40.88  | 45.75  | 100.00 | 32.93  | 32.93  |
| 10: ScRraA1 | 26.71  | 26.09  | 24.86  | 23.81  | 29.01  | 21.84  | 22.35  | 31.85  | 32.93  | 100.00 | 100.00 |
| 11: ScRraA2 | 26.71  | 26.09  | 24.86  | 23.81  | 29.01  | 21.84  | 22.02  | 31.41  | 32.93  | 100.00 | 100.00 |

**Table S1** Antibiotics resistance of ZJ-T, ZJ-T- $\Delta$ *rraA* and ZJ-T/over *rraA*-pSCT32

| Antibiotic                    | Concentration<br>( $\mu\text{g.piece}^{-1}$ ) | Size of inhibition zone/mm         |                            |                                   |
|-------------------------------|-----------------------------------------------|------------------------------------|----------------------------|-----------------------------------|
|                               |                                               | ZJ-T                               | ZJ-T- $\Delta$ <i>rraA</i> | ZJ-T/over <i>rraA</i> -<br>pSCT32 |
| Clindamycin                   | 2                                             | 0.00/R                             | 0.00/R                     | 0.00/R                            |
| Chloroamphenicol              | 30                                            | 24.67 $\pm$ 0.58/S                 | 24.57 $\pm$ 2.08/S         | 24.87 $\pm$ 1.14/S                |
| Furazolidone                  | 300                                           | 15.00 $\pm$ 1.00/I                 | 16.83 $\pm$ 1.04/I         | 14.60 $\pm$ 2.25/I                |
| Compound<br>sulfamethoxazoles | 1.25                                          | 0.00/R                             | 0.00/R                     | 0.00/R                            |
| Polymyxin B                   | 300 IU                                        | <b>15.00<math>\pm</math>1.00/I</b> | <b>0.00/R</b>              | <b>0.00/R</b>                     |
| Vancomycin                    | 30                                            | 0.00/R                             | 0.00/R                     | 0.00/R                            |
| Ciprofloxacin                 | 5                                             | 13.17 $\pm$ 3.69/R                 | 13.80 $\pm$ 1.06/R         | 12.67 $\pm$ 1.89/R                |
| Ofloxacin                     | 5                                             | 13.17 $\pm$ 2.02/I                 | 13.47 $\pm$ 3.22/I         | 13.30 $\pm$ 1.81/I                |
| norfloxacin                   | 10                                            | 12.90 $\pm$ 1.10/I                 | 12.00 $\pm$ 1.00/I         | 12.10 $\pm$ 1.80/I                |
| Midecamycinum                 | 30                                            | 11.60 $\pm$ 1.78/R                 | 119.60 $\pm$ 1.44/R        | 10.67 $\pm$ 6.81/R                |
| Erythromycin                  | 15                                            | 15.27 $\pm$ 3.20/I                 | 14.33 $\pm$ 1.53/I         | 12.33 $\pm$ 3.23/I                |
| Minocycline                   | 30                                            | 18.93 $\pm$ 4.31/S                 | 19.90 $\pm$ 4.25/S         | 18.13 $\pm$ 7.94/S                |
| Doxycycline                   | 30                                            | 17.40 $\pm$ 1.97/I                 | 17.67 $\pm$ 1.15/I         | 16.67 $\pm$ 1.45/I                |
| Tetracycline                  | 30                                            | 17.33 $\pm$ 1.15/I                 | 17.67 $\pm$ 0.58/I         | 16.27 $\pm$ 0.46/I                |
| Neomycin                      | 30                                            | 14.07 $\pm$ 0.90/I                 | 16.90 $\pm$ 0.14/I         | 14.60 $\pm$ 1.64/I                |
| kanamycin                     | 30                                            | 13.57 $\pm$ 1.89/I                 | 12.53 $\pm$ 0.76/I         | 12.80 $\pm$ 1.31/I                |
| Gentamicin                    | 10                                            | 13.27 $\pm$ 1.55/I                 | 12.33 $\pm$ 1.10/I         | 11.73 $\pm$ 2.61/I                |
| Amikacin                      | 30                                            | 12.07 $\pm$ 1.79/R                 | 14.33 $\pm$ 1.53/R         | 13.73 $\pm$ 0.71/R                |

|               |       |              |              |              |
|---------------|-------|--------------|--------------|--------------|
| Cefoperazone  | 75    | 0.00/R       | 0.00/R       | 0.00/R       |
| Ceftazidime   | 30    | 16.70±3.50/I | 16.70±2.10/I | 17.20±2.80/I |
| Cefuroxim     | 30    | 9.70±0.60/R  | 12.0±2.60/R  | 12.00±1.00/R |
| Cefradine     | 30    | 0.00±0.00/R  | 6.00±5.30/R  | 0.00±0.00/R  |
| Cefamezin     | 30    | 8.00±7.00/R  | 9.00±7.80/R  | 12.90±1.20/R |
| Cephalexin    | 30    | 4.00±6.90/R  | 11.30±4.00/R | 10.30±1.20/R |
| Piperacillin  | 100   | 0.00±0.00/R  | 0.00±0.00/R  | 0.00±0.00/R  |
| Carbenicillin | 100   | 0.00/R       | 0.00/R       | 0.00/R       |
| Ampicillin    | 10    | 0.00/R       | 0.00/R       | 0.00/R       |
| Oxacillin     | 1     | 0.00/R       | 0.00/R       | 0.00/R       |
| Penicillin    | 10 IU | 0.00/R       | 0.00/R       | 0.00/R       |

Note: S. Susceptible; I. Intermediate; R. Resistance

**Table S2** Nucleotide sequences of primers used in this study

| Primers                                            | Sequence (5'-3')                                     |
|----------------------------------------------------|------------------------------------------------------|
| For <i>rraA</i> mutant strain construction         |                                                      |
| pSW7848-F                                          | GTCTGATTCGTTACCAATTATGACAAC                          |
| pSW7848-R                                          | GAATTCGATATCAAGCTTATCGATAC                           |
| RraA-UP-F                                          | ataagcttgatcgaattcAGCGGATTTTATATTGTAAACAG            |
| RraA-UP-R                                          | agtcagcttTGTAATGTCTCTCATATTTCC                       |
| RraA-DOWN-F                                        | agacattacaAAGCTGGACTTCTAAAAAC                        |
| RraA-DOWN-R                                        | taattgtaacgaatcagacATGTTTCATAGGATCGAATTATTAG         |
| Del-check-pSW7848-F                                | TCACTGTCCCCTTATTCGCACC                               |
| Del-check-pSW7848-R                                | CTGCTTTTGAGCACTACCCG                                 |
| $\Delta$ -RraA-check-F                             | CTCCATTAAGCCTCGGCTCG                                 |
| $\Delta$ -RraA-check-R                             | ACCAAGATTGGCAACAAGGC                                 |
| For <i>rraA</i> complementary strain construction  |                                                      |
| pMMB207-F                                          | AGAAGCGGTCTGATAAAACAGAATTTGC                         |
| pMMB207-R                                          | GCGCAACGCAATTAATGTAAGTTAG                            |
| tac-com-RraA-F                                     | tataatgtgtggaattgtgaCGCTTGGGTGAGAAAATTC              |
| tac-com-RraA-R                                     | ctgatttaactgtatcaggCGCGACTCTTGATTACCAAG              |
| pMMB207-check-F                                    | TCTCTTCCGGGCGCTATCATG                                |
| pMMB207-check-R                                    | TCGTTTTATTTGATGCCTGGCAG                              |
| For <i>rraA</i> overexpression strain construction |                                                      |
| over-RraA-F                                        | TGTGACCAATTTGAAGACCAAGT                              |
| over-RraA-R                                        | TGAGGTTGGTTTAGGCTTTCGT                               |
| over-pSCT32-F                                      | ATAAGCTTGATATCGAATTCTGCACGCTCGCTTACCGG               |
| over-pSCT32-R                                      | AAATTAGCATTCTTTGCTCCTTGAGTAATCTCTAAATTTTCTT<br>GC    |
| For 5'-RACE                                        |                                                      |
| 5' adaptor Primer                                  | GCTGTCAACGATACGCTACGTAACGGCATGACAGTGGGGGG<br>GGGGGGG |
| 5'-RACE Outer Primer                               | GCTGTCAACGATACGCTACGTAAC                             |
| 5'-RACE- <i>rraA</i> -R1                           | GGTAGCCGTTGAATTGGCG                                  |
| 5'-RACE- <i>rraA</i> -R2                           | ACTGGGCGAAGATGGAACG                                  |
| 5'-RACE- <i>rraA</i> -R3                           | TGGGTGGGAAGGCATCATTG                                 |
| 5'-RACE- <i>rraA</i> -R4                           | ACTACGTTTACGCGGACTGG                                 |
| For translational fusions                          |                                                      |
| pSCT32-gfp_F                                       | GTGAGCAAGGGCGAGGAGCT                                 |
| pSCT32-gfp_R                                       | TAAATGCATGCCGCTTCGCCTT                               |
| pSCT32-gfp-check-F                                 | CGCTATCGCTACGTGACTGG                                 |
| pSCT32-gfp-check-R                                 | GTTTCACTTCTGAGTTTCGGCATG                             |
| <i>rraA</i> -TL-F                                  | ggcgaagcggcatgcatcatttaAGGAACATTAAGCAATGTTC          |
| <i>rraA</i> -TL-R                                  | agctcctcgccttgcctcacAATATCGGGTGTAATGTC               |
| For qRT-PCR                                        |                                                      |

---

|               |                          |
|---------------|--------------------------|
| luxO-F        | CAGAGCGACCGTAAAGACAAG    |
| luxO-R        | CTGTTGTTGCTCCAGTAAAGGC   |
| csgD-F        | GAAGAACTCGCTTCTTGGCCT    |
| csgD-R        | TCAAGTAATCTTCGAGACAGCCA  |
| tssC1-F       | TTCACCAGCACTATTCGGCTT    |
| tssC1-R       | GCACTCTCGCGGAACGAAC      |
| tssM1-F       | CACTAGAATACGCCCAATGGC    |
| tssM1-R       | ACTCTTCGACTGGAGCGGTA     |
| etk-F         | AAATCTTCGCAAAGTTTAGACAGC |
| etk-R         | GTAGCGCTGTGCCAGTTCA      |
| BAU10_21865-F | GCGCAATTGCATAAGCCTCA     |
| BAU10_21865-R | TTTCGTCCGATCGGTTCTCG     |

---

**Table S3** *Vibrio alginolyticus* genes are up/down regulated significantly in *rraA* mutant.  
Orange shade: Differentially expressed genes mentioned in the article.

| id          | Symbol        | Description                                                      | TR-FC     | FDR    |
|-------------|---------------|------------------------------------------------------------------|-----------|--------|
| BAU10_00035 | --            | oligosaccharide flippase family protein                          | -2.2860   | 0.0009 |
| BAU10_00040 | --            | glycosyltransferase family 2 protein                             | -2.1894   | 0.0061 |
| BAU10_00145 | --            | site-specific integrase                                          | -2.2383   | 0.0000 |
| BAU10_00175 | --            | helix-turn-helix transcriptional regulator                       | 2.0907    | 0.0000 |
| BAU10_00190 | --            | hypothetical protein                                             | -2.8149   | 0.0015 |
| BAU10_00280 | <i>hslU</i>   | heat shock protein HslVU, ATPase subunit HslU                    | 2.3158    | 0.0000 |
| BAU10_00285 | <i>hslV</i>   | ATP-dependent protease HslV                                      | 2.0877    | 0.0000 |
| BAU10_00335 | <i>rpsS</i>   | 30S ribosomal protein S9                                         | 2.1475    | 0.0000 |
| BAU10_00340 | <i>rplV</i>   | 50S ribosomal protein L22                                        | 2.0133    | 0.0000 |
| BAU10_00355 | <i>rpmC</i>   | 50S ribosomal protein L29                                        | 2.2501    | 0.0000 |
| BAU10_00485 | <i>cysG</i>   | uroporphyrinogen-III C-methyltransferase                         | 2.1121    | 0.0000 |
| BAU10_00490 | <i>cysD</i>   | sulfate adenylyltransferase subunit 2                            | 2.2986    | 0.0000 |
| BAU10_00800 | <i>glmS</i>   | glucosamine--fructose-6-phosphate aminotransferase (isomerizing) | -2.2784   | 0.0000 |
| BAU10_00850 | <i>mtlD</i>   | mannitol--phosphate 5-dehydrogenase                              | -2.9582   | 0.0000 |
| BAU10_01015 | <i>yqeY</i>   | Transamidase GatB domain protein                                 | -2.6599   | 0.0000 |
| BAU10_01210 | <i>diaA</i>   | putative phosphoheptose isomerase                                | -2.1743   | 0.0000 |
| BAU10_01335 | --            | hypothetical protein                                             | -2.4414   | 0.0020 |
| BAU10_01360 | <i>btuF</i>   | vitamin B2 ABC transporter substrate-binding protein BtuF        | -2.7369   | 0.0000 |
| BAU10_01365 | <i>cobD</i>   | cobalamin biosynthesis family protein                            | -2.5955   | 0.0000 |
| BAU10_01400 | <i>yhcC</i>   | TIGR022 family radical SAM protein                               | -2.2515   | 0.0000 |
| BAU10_01430 | <i>RraA</i>   | ribonuclease E inhibitor RraA                                    | -246.1481 | 0.0000 |
| BAU10_01460 | <i>grcA</i>   | formate acetyl transferase-related protein                       | 3.1420    | 0.0000 |
| BAU10_01540 | <i>zraR</i>   | sigma-54 dependent transcriptional regulator                     | 2.0687    | 0.0000 |
| BAU10_01605 | <i>hlyU</i>   | transcriptional activator HlyU                                   | -2.1899   | 0.0000 |
| BAU10_01660 | --            | putative carbon starvation protein A                             | -2.1269   | 0.0000 |
| BAU10_01735 | <i>yfiA</i>   | putative sigma-54 modulation protein                             | 2.2467    | 0.0000 |
| BAU10_01760 | <i>clpB</i>   | ATP-dependent chaperone ClpB                                     | 2.0636    | 0.0000 |
| BAU10_02360 | --            | DUF3622 domain-containing protein                                | -2.4970   | 0.0019 |
| BAU10_02380 | --            | DUF3332 family protein                                           | 2.1651    | 0.0019 |
| BAU10_02545 | <i>metQ</i>   | lipoprotein YaeC                                                 | 2.1840    | 0.0000 |
| BAU10_02810 | <i>lolB</i>   | lipoprotein localization protein LolB                            | -2.1803   | 0.0000 |
| BAU10_02895 | --            | copper amine oxidase                                             | 2.0011    | 0.0013 |
| BAU10_02900 | <i>copA</i>   | copper-translocating P-type ATPase                               | 10.4461   | 0.0000 |
| BAU10_02920 | --            | hypothetical protein                                             | 3.2224    | 0.0000 |
| BAU10_02925 | <i>ompA1</i>  | outer membrane protein OmpA                                      | 2.6443    | 0.0000 |
| BAU10_03050 | <i>flaE</i>   | flagellin                                                        | -2.0206   | 0.0000 |
| BAU10_03145 | --            | selenoprotein W-related protein                                  | -2.5169   | 0.0028 |
| BAU10_03150 | --            | sulfite exporter TauE/SafE family protein                        | -4.0674   | 0.0000 |
| BAU10_03165 | <i>htpG</i>   | molecular chaperone HtpG                                         | 2.1408    | 0.0000 |
| BAU10_03345 | --            | membrane protein                                                 | -2.5620   | 0.0266 |
| BAU10_03535 | --            | putative phospholipid biosynthesis acyltransferase               | -3.3257   | 0.0000 |
| BAU10_03550 | --            | methyltransferase domain-containing protein                      | -2.0314   | 0.0000 |
| BAU10_03655 | --            | rhombosortase                                                    | -3.0953   | 0.0000 |
| BAU10_03715 | <i>VP0936</i> | putative sulfate exporter family transporter                     | -2.8353   | 0.0000 |
| BAU10_03720 | <i>lplT</i>   | acyl-phosphate glycerol 3-phosphate acyltransferase              | -3.1946   | 0.0000 |

|             |                |                                                                |           |        |
|-------------|----------------|----------------------------------------------------------------|-----------|--------|
| BAU10_04030 | <i>priC</i>    | primosomal replication protein N"                              | -2.1696   | 0.0000 |
| BAU10_04080 | <i>infA</i>    | Translation initiation factor IF-                              | -2.5142   | 0.0000 |
| BAU10_04125 | --             | alpha/beta hydrolase                                           | -2.1278   | 0.0000 |
| BAU10_04160 | <i>elyC</i>    | envelope biogenesis factor ElyC                                | -2.0233   | 0.0000 |
| BAU10_04220 | <i>PBPRA3</i>  | YebC/PmpR family DNA-binding transcriptional regulator         | 2.2416    | 0.0000 |
| BAU10_04330 | <i>alaE</i>    | L-alanine exporter AlaE                                        | -2.3245   | 0.0000 |
| BAU10_04360 | --             | MULTISPECIES: hypothetical protein                             | -14.1463  | 0.0115 |
| BAU10_04425 | --             | phosphohydrolase                                               | -2.2934   | 0.0047 |
| BAU10_04450 | --             | HigA family addiction module antidote protein                  | 2.1581    | 0.0039 |
| BAU10_04500 | --             | type IV secretion system protein TraC                          | 2.2143    | 0.0253 |
| BAU10_04605 | <i>ssb</i>     | Single-stranded DNA-binding protein                            | 1493.3333 | 0.0152 |
| BAU10_04700 | --             | hypothetical protein VH709_contig00050-027                     | -81.7995  | 0.0000 |
| BAU10_04705 | <i>dpiA</i>    | response regulator                                             | -2.9674   | 0.0000 |
| BAU10_04710 | <i>citA</i>    | sensor histidine kinase                                        | -9.1137   | 0.0000 |
| BAU10_04715 | <i>oadB</i>    | oxaloacetate decarboxylase, beta subunit                       | -13.5250  | 0.0000 |
| BAU10_04720 | <i>oadA</i>    | oxaloacetate decarboxylase alpha subunit                       | -17.6992  | 0.0000 |
| BAU10_04725 | <i>oadG2</i>   | oxaloacetate decarboxylase                                     | -30.8077  | 0.0000 |
| BAU10_04730 | <i>citP</i>    | Na(+)/citrate OH(-) antiporter                                 | -32.5623  | 0.0000 |
| BAU10_04735 | <i>citC</i>    | citrate carrier                                                | -354.3796 | 0.0000 |
| BAU10_04740 | <i>citD</i>    | citrate lyase acyl carrier protein                             | -21.8218  | 0.0000 |
| BAU10_04745 | <i>citE</i>    | citrate (pro-3S)-lyase subunit beta                            | -18.9873  | 0.0000 |
| BAU10_04750 | <i>citF</i>    | citrate lyase subunit alpha                                    | -15.1257  | 0.0000 |
| BAU10_04755 | <i>citX</i>    | holo-ACP synthase CitX                                         | -165.1630 | 0.0000 |
| BAU10_04760 | <i>citG</i>    | 2-(5"-triphosphoribosyl)-3'-dephospho-CoA synthase             | -163.9326 | 0.0000 |
| BAU10_04765 | --             | hypothetical protein                                           | -95.1028  | 0.0000 |
| BAU10_05015 | --             | zinc ABC transporter permease                                  | -2.8621   | 0.0147 |
| BAU10_05045 | --             | hypothetical protein                                           | -2.6798   | 0.0107 |
| BAU10_05120 | <i>lpxH</i>    | UDP-2,3-diacylglucosamine diphosphatase                        | -2.7719   | 0.0000 |
| BAU10_05300 | <i>HI_0042</i> | TIGR062 family pseudouridine synthase                          | -2.7190   | 0.0001 |
| BAU10_05450 | --             | transcriptional regulator, TetR family                         | 4.8065    | 0.0000 |
| BAU10_05495 | <i>lysO</i>    | membrane protein                                               | -2.0966   | 0.0000 |
| BAU10_05505 | <i>tfoX</i>    | DNA transformation protein                                     | -2.5778   | 0.0000 |
| BAU10_05680 | --             | sporulation protein                                            | 2.0350    | 0.0000 |
| BAU10_05790 | <i>VP300</i>   | antiholin-like protein LrgA                                    | -2.7338   | 0.0000 |
| BAU10_05845 | <i>btuD</i>    | vitamin B2 ABC transporter ATP-binding protein BtuD            | -2.0561   | 0.0001 |
| BAU10_05985 | <i>oppA</i>    | peptide ABC transporter substrate-binding protein              | -3.3725   | 0.0173 |
| BAU10_05990 | <i>yqjE</i>    | M20/M25/M40 family metallo-hydrolase                           | -2.1129   | 0.0000 |
| BAU10_06130 | <i>CPA</i>     | N-carbamoylputrescine amidase                                  | 2.3101    | 0.0219 |
| BAU10_06160 | <i>pecS</i>    | transcriptional regulator, MarR family protein                 | 2.2008    | 0.0000 |
| BAU10_06370 | <i>xseA</i>    | exodeoxyribonuclease VII large subunit                         | 2.8176    | 0.0000 |
| BAU10_06390 | <i>N4bp2l</i>  | AAA family ATPase                                              | 2.5111    | 0.0140 |
| BAU10_06495 | <i>ousX</i>    | L-proline glycine betaine binding ABC transporter protein ProX | 2.0481    | 0.0000 |
| BAU10_06505 | <i>ousV</i>    | ABC superfamily (glycine/betaine/proline transport protein)    | 2.3856    | 0.0000 |
| BAU10_06530 | <i>ectB</i>    | Diaminobutyrate--2-oxoglutarate transaminase                   | 2.2615    | 0.0000 |
| BAU10_06535 | <i>ectC</i>    | ectoine synthase                                               | 2.2779    | 0.0007 |
| BAU10_06675 | <i>rhtB</i>    | putative homoserine/homoserine lactone efflux protein          | -2.1292   | 0.0041 |
| BAU10_06680 | <i>yjjI</i>    | YjjI family glycine radical enzyme                             | -2.0204   | 0.0000 |

|             |                 |                                                                    |         |        |
|-------------|-----------------|--------------------------------------------------------------------|---------|--------|
| BAU10_06685 | <i>yjjW</i>     | YjjW family glycine radical enzyme activase                        | -2.3490 | 0.0000 |
| BAU10_06935 | --              | Hpt domain-containing protein                                      | 6.9962  | 0.0000 |
| BAU10_06995 | <i>dgcC</i>     | diguanylate cyclase                                                | -2.2260 | 0.0000 |
| BAU10_07295 | <i>rmf</i>      | ribosome modulation factor                                         | 2.0377  | 0.0000 |
| BAU10_07450 | <i>acyP</i>     | acylphosphate phosphohydrolase                                     | 3.7176  | 0.0357 |
| BAU10_07550 | <i>CRYZ</i>     | zinc-binding dehydrogenase                                         | 2.0646  | 0.0001 |
| BAU10_07700 | <i>prpB</i>     | carboxyphosphoenolpyruvate phosphonmutase                          | 3.4957  | 0.0000 |
| BAU10_07910 | <i>yscG</i>     | putative type III secretion protein                                | 2.7632  | 0.0010 |
| BAU10_07915 | <i>pscF</i>     | type III export protein YscF                                       | 2.9519  | 0.0015 |
| BAU10_08025 | --              | Cation transport ATPase                                            | 2.1360  | 0.0053 |
| BAU10_08260 | --              | damage-inducible protein J                                         | 2.0298  | 0.0001 |
| BAU10_08505 | --              | hypothetical protein                                               | 5.0189  | 0.0033 |
| BAU10_08620 | --              | EAL domain-containing protein                                      | -4.0292 | 0.0000 |
| BAU10_08670 | --              | porin family protein                                               | -2.2683 | 0.0000 |
| BAU10_08755 | --              | imelysin family protein                                            | 2.5801  | 0.0001 |
| BAU10_08815 | --              | hypothetical protein                                               | -2.1100 | 0.0000 |
| BAU10_08820 | --              | tetratricopeptide repeat protein                                   | -2.1708 | 0.0000 |
| BAU10_08865 | <i>nspC</i>     | carboxynorspermidine decarboxylase                                 | 3.1475  | 0.0000 |
| BAU10_08870 | <i>N646_023</i> | Carboxynorspermidine synthase                                      | 2.8272  | 0.0000 |
| BAU10_08900 | <i>pgsA</i>     | CDP-diacylglycerol--glycerol-3-phosphate 3-phosphatidyltransferase | -2.0053 | 0.0000 |
| BAU10_09015 | <i>luxN</i>     | hybrid sensor histidine kinase/response regulator                  | -2.2644 | 0.0000 |
| BAU10_09240 | <i>ttrA</i>     | tetrathionate reductase subunit TtrA                               | 2.0475  | 0.0000 |
| BAU10_09255 | <i>pqiA</i>     | paraquat-inducible protein A                                       | -2.1961 | 0.0000 |
| BAU10_09525 | <i>dgcT</i>     | putative GGDEF family protein                                      | -2.6647 | 0.0000 |
| BAU10_09575 | <i>oppF</i>     | oligopeptide ABC transporter, ATP-binding protein                  | 2.1586  | 0.0000 |
| BAU10_09610 | <i>moaC</i>     | molybdenum cofactor biosynthesis protein C                         | -2.2901 | 0.0000 |
| BAU10_09620 | <i>moaA</i>     | GTP 3',8-cyclase MoaA                                              | -2.0752 | 0.0000 |
| BAU10_09700 | <i>motY</i>     | sodium-type flagellar protein MotY                                 | -2.9465 | 0.0000 |
| BAU10_09905 | <i>gloA</i>     | putative lactoylglutathione lyase                                  | -2.1168 | 0.0005 |
| BAU10_09910 | --              | antibiotic biosynthesis monooxygenase                              | -2.1184 | 0.0008 |
| BAU10_09930 | <i>aqpZ</i>     | aquaporin Z                                                        | 3.6471  | 0.0000 |
| BAU10_10155 | <i>ccmB</i>     | heme exporter protein B                                            | -3.0025 | 0.0000 |
| BAU10_10225 | <i>flhB</i>     | flagellar biosynthesis protein B                                   | -2.7314 | 0.0000 |
| BAU10_10230 | <i>fliR</i>     | flagellar biosynthetic protein FliR                                | -2.7926 | 0.0000 |
| BAU10_10235 | <i>fliQ</i>     | flagellar biosynthesis protein Q                                   | -3.5599 | 0.0000 |
| BAU10_10240 | <i>fliP</i>     | flagellar type III secretion system pore protein FliP              | -2.8032 | 0.0000 |
| BAU10_10275 | --              | flagellar biosynthesis chaperone                                   | -3.2047 | 0.0000 |
| BAU10_10375 | --              | conserved hypothetical protein                                     | -2.3385 | 0.0000 |
| BAU10_10465 | <i>purM</i>     | Phosphoribosylformylglycinamidine cyclo-ligase                     | -2.5262 | 0.0004 |
| BAU10_10485 | <i>fadE</i>     | acyl-CoA dehydrogenase                                             | 2.1117  | 0.0007 |
| BAU10_10620 | <i>cdsA</i>     | Phosphatidate cytidyltransferase                                   | -2.3189 | 0.0000 |
| BAU10_10625 | <i>uppS</i>     | undecaprenyl diphosphate synthase                                  | -2.3229 | 0.0000 |
| BAU10_10665 | <i>truC</i>     | tRNA pseudouridine synthase C                                      | -2.2817 | 0.0020 |
| BAU10_10685 | --              | GNAT family N-acetyltransferase                                    | -3.6762 | 0.0000 |
| BAU10_10700 | --              | ketoacyl-ACP synthase III                                          | -2.6098 | 0.0303 |
| BAU10_10725 | --              | hypothetical protein                                               | -2.8340 | 0.0000 |
| BAU10_10795 | --              | DUF2789 domain-containing protein                                  | 2.4084  | 0.0002 |

|             |               |                                                                              |           |        |
|-------------|---------------|------------------------------------------------------------------------------|-----------|--------|
| BAU10_10940 | --            | hypothetical protein                                                         | -2.5848   | 0.0000 |
| BAU10_10990 | --            | nitrogen-fixing protein NifU                                                 | 2.1321    | 0.0002 |
| BAU10_10995 | --            | GGGtGRT protein                                                              | 2.1827    | 0.0006 |
| BAU10_11075 | --            | dentin sialophosphoprotein                                                   | 2.7203    | 0.0138 |
| BAU10_11120 | --            | PilZ domain-containing protein                                               | -2.0432   | 0.0000 |
| BAU10_11155 | <i>HI_059</i> | NupC family protein                                                          | -2.0348   | 0.0000 |
| BAU10_11250 | <i>pleD</i>   | GGDEF domain protein                                                         | -2.0237   | 0.0001 |
| BAU10_11430 | --            | conjugative transfer protein TraI                                            | -2.4160   | 0.0006 |
| BAU10_11505 | <i>str</i>    | streptomycin resistance protein B                                            | -2.0544   | 0.0000 |
| BAU10_11595 | --            | hypothetical protein                                                         | 4.3060    | 0.0000 |
| BAU10_11625 | <i>ubiV</i>   | U32 family peptidase                                                         | -2.2153   | 0.0000 |
| BAU10_11925 | --            | efflux transporter periplasmic adaptor subunit                               | -2.3086   | 0.0000 |
| BAU10_11950 | <i>evgS</i>   | response regulator                                                           | -2.0397   | 0.0000 |
| BAU10_12030 | <i>VP2494</i> | YacL family protein                                                          | 1666.6667 | 0.0181 |
| BAU10_12135 | <i>aceF</i>   | pyruvate dehydrogenase complex dihydrolipoyllysine-residue acetyltransferase | 2.0026    | 0.0000 |
| BAU10_12140 | <i>aceE</i>   | pyruvate dehydrogenase (acetyl-transferring), homodimeric type               | 2.0703    | 0.0000 |
| BAU10_12220 | <i>ypjD</i>   | inner membrane protein YpjD                                                  | -3.1150   | 0.0000 |
| BAU10_12535 | <i>ygfA</i>   | 5-formyltetrahydrofolate cyclo-ligase                                        | -2.6107   | 0.0000 |
| BAU10_12615 | <i>sprT</i>   | SprT protein                                                                 | 2.3075    | 0.0024 |
| BAU10_13100 | --            | DUF206 domain-containing protein                                             | -3.2425   | 0.0000 |
| BAU10_13275 | <i>ylaK</i>   | PhoH family protein                                                          | 2.0623    | 0.0003 |
| BAU10_13300 | <i>VP2688</i> | Maf-like protein                                                             | -2.1893   | 0.0000 |
| BAU10_13310 | <i>mreC</i>   | rod shape-determining protein MreC                                           | -2.4252   | 0.0000 |
| BAU10_13495 | <i>cysI</i>   | assimilatory sulfite reductase (NADPH) hemoprotein subunit                   | 2.1409    | 0.0000 |
| BAU10_13500 | <i>cysJ</i>   | sulfite reductase                                                            | 2.6846    | 0.0000 |
| BAU10_13660 | <i>argG</i>   | argininosuccinate synthase                                                   | -2.4271   | 0.0000 |
| BAU10_13670 | <i>argC</i>   | N-acetyl-gamma-glutamyl-phosphate reductase                                  | 2.0888    | 0.0012 |
| BAU10_13685 | --            | predicted transcriptional regulator                                          | -2.3163   | 0.0000 |
| BAU10_13720 | <i>bfd</i>    | bacterioferritin-associated ferredoxin                                       | 2.9305    | 0.0129 |
| BAU10_13745 | <i>tusB</i>   | sulfurtransferase complex subunit TusB                                       | -2.3826   | 0.0000 |
| BAU10_13750 | <i>tusC</i>   | sulfurtransferase complex subunit TusC                                       | -2.0300   | 0.0000 |
| BAU10_13835 | --            | DUF338 domain-containing protein                                             | 2.0585    | 0.0000 |
| BAU10_13860 | --            | MarR family transcriptional regulator                                        | 2.4856    | 0.0000 |
| BAU10_13865 | <i>pecM</i>   | EamA family transporter                                                      | 3.5000    | 0.0000 |
| BAU10_14050 | --            | DMT family transporter                                                       | -2.0305   | 0.0001 |
| BAU10_14110 | <i>frdB</i>   | succinate dehydrogenase                                                      | -2.1093   | 0.0000 |
| BAU10_14115 | <i>frdC</i>   | Fumarate reductase subunit C                                                 | -2.1079   | 0.0000 |
| BAU10_14120 | <i>frdD</i>   | fumarate reductase subunit D                                                 | -2.0550   | 0.0000 |
| BAU10_14475 | <i>yhgN</i>   | multiple antibiotic resistance protein marC                                  | -3.2043   | 0.0000 |
| BAU10_14490 | --            | DUF445 domain-containing protein                                             | 2.2714    | 0.0000 |
| BAU10_14515 | <i>gap3</i>   | glyceraldehyde 3-phosphate dehydrogenase                                     | 2.0200    | 0.0000 |
| BAU10_14700 | <i>yhhQ</i>   | putative preQ0 transporter                                                   | 3.1877    | 0.0011 |
| BAU10_14765 | <i>mdtL</i>   | multidrug resistance protein, putative                                       | -2.0354   | 0.0000 |
| BAU10_15010 | <i>tnpR</i>   | resolvase                                                                    | 2.0372    | 0.0043 |
| BAU10_15015 | --            | hypothetical protein                                                         | 3.5507    | 0.0000 |
| BAU10_15210 | <i>ibpA</i>   | 6 kDa heat shock protein A                                                   | 2.9344    | 0.0000 |



|             |                 |                                                                         |          |        |
|-------------|-----------------|-------------------------------------------------------------------------|----------|--------|
| BAU10_15270 | <i>fadB</i>     | fatty acid oxidation complex subunit alpha FadB                         | 2.3810   | 0.0002 |
| BAU10_15450 | <i>mdtI</i>     | multidrug resistance protein MdtI                                       | 3.7166   | 0.0035 |
| BAU10_15480 | <i>xapA</i>     | xanthosine phosphorylase                                                | -7.7074  | 0.0000 |
| BAU10_15525 | <i>bioP</i>     | DMT family transporter                                                  | -2.6426  | 0.0000 |
| BAU10_15615 | --              | EamA family transporter                                                 | -2.1083  | 0.0000 |
| BAU10_15710 | <i>PA727</i>    | EAL domain-containing protein                                           | -2.3138  | 0.0000 |
| BAU10_15810 | <i>epsH</i>     | prepilin-type N-terminal cleavage/methylation domain-containing protein | -2.3768  | 0.0000 |
| BAU10_16535 | --              | hypothetical protein                                                    | -2.1187  | 0.0183 |
| BAU10_16540 | --              | C factor cell-cell signaling protein                                    | 2.1772   | 0.0136 |
| BAU10_16630 | <i>ulaA</i>     | ascorbate-specific PTS system enzyme IIC                                | -14.7107 | 0.0000 |
| BAU10_16635 | --              | PTS sugar transporter subunit IIB                                       | -17.7375 | 0.0000 |
| BAU10_16640 | <i>ulaC</i>     | PTS mannitol transporter subunit IIA                                    | -5.6459  | 0.0000 |
| BAU10_16715 | <i>ompA</i>     | OmpA family protein                                                     | 2.9149   | 0.0000 |
| BAU10_16730 | --              | hypothetical protein                                                    | 2.2388   | 0.0106 |
| BAU10_16760 | <i>mltD</i>     | lytic transglycosylase domain-containing protein                        | -4.1235  | 0.0003 |
| BAU10_16955 | --              | Nudix-related transcriptional regulator NrtR                            | 2.7841   | 0.0000 |
| BAU10_16960 | <i>pncB</i>     | nicotinate phosphoribosyltransferase                                    | 2.8745   | 0.0000 |
| BAU10_16990 | --              | putative outer membrane protein                                         | -3.4370  | 0.0000 |
| BAU10_17140 | --              | TetR/AcrR family transcriptional regulator                              | 2.7032   | 0.0003 |
| BAU10_17190 | --              | hypothetical protein                                                    | -2.1521  | 0.0008 |
| BAU10_17235 | <i>purA2</i>    | adenylosuccinate synthase                                               | 2.7685   | 0.0000 |
| BAU10_17310 | <i>nema</i>     | alkene reductase                                                        | 4.3237   | 0.0003 |
| BAU10_17425 | <i>scrY</i>     | carbohydrate porin                                                      | -2.0612  | 0.0001 |
| BAU10_17460 | --              | putative DamX-related protein                                           | -2.7208  | 0.0420 |
| BAU10_17475 | --              | adenosine deaminase                                                     | -5.3615  | 0.0044 |
| BAU10_17480 | --              | hypothetical protein                                                    | -6.5696  | 0.0001 |
| BAU10_17485 | <i>cspA</i>     | cold shock transcriptional regulator CspA                               | -17.3939 | 0.0000 |
| BAU10_17520 | <i>dgkA</i>     | diacylglycerol kinase                                                   | -2.8645  | 0.0094 |
| BAU10_17525 | --              | hypothetical protein                                                    | -2.1594  | 0.0079 |
| BAU10_17530 | <i>rstB</i>     | sensor histidine kinase                                                 | -2.1775  | 0.0000 |
| BAU10_17770 | --              | ATPase                                                                  | -2.1179  | 0.0027 |
| BAU10_17870 | <i>pepT</i>     | peptidase T                                                             | -2.3575  | 0.0000 |
| BAU10_17890 | <i>hlyB</i>     | HAMP domain-containing protein                                          | -2.4583  | 0.0000 |
| BAU10_17990 | --              | hypothetical protein                                                    | -2.0910  | 0.0000 |
| BAU10_18030 | --              | ABC transporter substrate-binding protein                               | -6.3816  | 0.0014 |
| BAU10_18220 | <i>RF_0358</i>  | multidrug efflux MFS transporter                                        | 2.4435   | 0.0016 |
| BAU10_18285 | <i>pagL</i>     | 6-phospho-alpha-glucosidase                                             | 7.2669   | 0.0000 |
| BAU10_18355 | <i>fabG</i>     | SDR family oxidoreductase                                               | 2.7471   | 0.0000 |
| BAU10_18445 | <i>thlA</i>     | thiolase family protein                                                 | 3.2941   | 0.0001 |
| BAU10_18455 | <i>ACAD8</i>    | acyl-CoA dehydrogenase                                                  | 4.2746   | 0.0011 |
| BAU10_18490 | <i>betB</i>     | betaine-aldehyde dehydrogenase                                          | 2.7062   | 0.0000 |
| BAU10_19230 | <i>fruA</i>     | PTS fructose transporter subunit IIBC                                   | 2.7956   | 0.0000 |
| BAU10_19235 | <i>fruK</i>     | 1-phosphofructokinase                                                   | 6.8853   | 0.0000 |
| BAU10_19240 | <i>fruB</i>     | bifunctional PTS fructose transporter subunit IIA/HPr protein           | 5.9005   | 0.0008 |
| BAU10_19260 | <i>AZC_3085</i> | diguanylate phosphodiesterase                                           | -2.3485  | 0.0000 |
| BAU10_19275 | <i>glnP</i>     | polar amino acid ABC transporter permease                               | -2.2128  | 0.0001 |

|             |                  |                                                               |         |        |
|-------------|------------------|---------------------------------------------------------------|---------|--------|
| BAU10_19280 | <i>aapP</i>      | amino acid ABC transporter ATP-binding protein                | -2.3330 | 0.0000 |
| BAU10_19375 | <i>focA</i>      | formate transporter FocA                                      | -2.1716 | 0.0000 |
| BAU10_19405 | --               | hypothetical protein                                          | 2.5170  | 0.0000 |
| BAU10_19580 | --               | hypothetical protein                                          | 3.6639  | 0.0000 |
| BAU10_19585 | --               | DUF998 domain-containing protein                              | 4.0423  | 0.0000 |
| BAU10_19590 | --               | DUF2075 domain-containing protein                             | 4.5927  | 0.0000 |
| BAU10_19595 | --               | hypothetical protein                                          | 4.5301  | 0.0000 |
| BAU10_19600 | --               | AAA family ATPase                                             | 3.3549  | 0.0000 |
| BAU10_19605 | <i>yqhH</i>      | DEAD/DEAH box helicase                                        | 3.3896  | 0.0000 |
| BAU10_19610 | <i>MJECS02</i>   | hypothetical protein                                          | 3.1174  | 0.0000 |
| BAU10_19615 | <i>yqhH</i>      | DEAD/DEAH box helicase family protein                         | 2.9192  | 0.0000 |
| BAU10_19620 | --               | hypothetical protein                                          | 2.6092  | 0.0000 |
| BAU10_19625 | <i>MJ59</i>      | AAA family ATPase                                             | 3.6075  | 0.0000 |
| BAU10_19630 | --               | DEAD/DEAH box helicase                                        | 3.4484  | 0.0000 |
| BAU10_19635 | <i>rep</i>       | DNA helicase                                                  | 3.6662  | 0.0000 |
| BAU10_19670 | <i>Bmul_4720</i> | transposase                                                   | 6.7053  | 0.0277 |
| BAU10_19675 | --               | ATP-binding protein                                           | 2.9118  | 0.0000 |
| BAU10_19680 | <i>yrrC</i>      | AAA family ATPase                                             | 3.2625  | 0.0000 |
| BAU10_19685 | --               | hypothetical protein                                          | 3.3528  | 0.0002 |
| BAU10_19690 | --               | hypothetical protein                                          | 3.0723  | 0.0000 |
| BAU10_19695 | --               | hypothetical protein                                          | 2.6564  | 0.0000 |
| BAU10_19700 | --               | site-specific integrase                                       | 2.4146  | 0.0000 |
| BAU10_19705 | --               | site-specific integrase                                       | 2.2238  | 0.0000 |
| BAU10_19770 | <i>pleD</i>      | GGDEF domain-containing protein                               | -2.6099 | 0.0000 |
| BAU10_19785 | <i>modC</i>      | molybdenum ABC transporter ATP-binding protein ModC           | -2.3471 | 0.0000 |
| BAU10_19790 | <i>modB</i>      | molybdate ABC transporter permease subunit                    | -2.1013 | 0.0000 |
| BAU10_19890 | <i>ydeP</i>      | FdhF/YdeP family oxidoreductase                               | 2.7386  | 0.0000 |
| BAU10_19900 | <i>fdhD</i>      | formate dehydrogenase family accessory protein FdhD           | 2.8070  | 0.0000 |
| BAU10_19910 | <i>uhpA</i>      | transcriptional regulator UhpA                                | -2.8231 | 0.0021 |
| BAU10_19915 | <i>uhpB</i>      | signal transduction histidine-protein kinase/phosphatase UhpB | -2.7180 | 0.0000 |
| BAU10_20115 | <i>dld</i>       | D-lactate dehydrogenase                                       | 2.8869  | 0.0000 |
| BAU10_20155 | --               | cytochrome c553                                               | 7.7266  | 0.0000 |
| BAU10_20205 | --               | Putative cytoplasmic protein USSDB7A                          | 2.2930  | 0.0000 |
| BAU10_20210 | <i>tssH</i>      | type VI secretion system ATPase TssH                          | 3.6085  | 0.0000 |
| BAU10_20215 | <i>tssG</i>      | type VI secretion system baseplate subunit TssG               | 2.9399  | 0.0000 |
| BAU10_20220 | <i>tssF</i>      | VAT2t                                                         | 2.9010  | 0.0000 |
| BAU10_20225 | --               | lysozyme                                                      | 2.3397  | 0.0009 |
| BAU10_20230 | --               | protein of avirulence locus                                   | 4.3501  | 0.0000 |
| BAU10_20235 | <i>tssC2</i>     | type VI secretion system contractile sheath large subunit     | 2.5604  | 0.0000 |
| BAU10_20240 | <i>tssC1</i>     | type VI secretion system contractile sheath large subunit     | 4.2778  | 0.0000 |
| BAU10_20245 | <i>tssB1</i>     | type VI secretion protein                                     | 3.6842  | 0.0000 |
| BAU10_20250 | <i>tssA</i>      | type VI secretion system protein TssA                         | 2.6115  | 0.0000 |
| BAU10_20255 | <i>prpC</i>      | phosphoprotein phosphatase                                    | 2.2260  | 0.0019 |
| BAU10_20265 | <i>tssM1</i>     | type VI secretion system membrane subunit TssM                | 2.9486  | 0.0000 |
| BAU10_20270 | <i>tssL</i>      | type VI secretion system protein TssL                         | 3.3151  | 0.0000 |
| BAU10_20275 | --               | type VI secretion system-associated protein                   | 2.6661  | 0.0000 |
| BAU10_20280 | <i>vasD</i>      | type VI secretion lipoprotein/VasD                            | 2.8214  | 0.0000 |

|             |                 |                                                             |         |        |
|-------------|-----------------|-------------------------------------------------------------|---------|--------|
| BAU10_20285 | <i>tagH</i>     | type VI secretion system-associated FHA domain protein TagH | 2.9842  | 0.0000 |
| BAU10_20290 | <i>prkC</i>     | serine/threonine protein kinase                             | 3.1916  | 0.0000 |
| BAU10_20400 | --              | hypothetical protein                                        | -3.6674 | 0.0000 |
| BAU10_20435 | --              | hypothetical protein                                        | 3.6934  | 0.0495 |
| BAU10_20445 | --              | hypothetical protein                                        | 2.2344  | 0.0002 |
| BAU10_20450 | <i>RP573</i>    | copper resistance protein CopZ                              | 3.3580  | 0.0000 |
| BAU10_20490 | <i>PA2953</i>   | electron transfer flavoprotein-ubiquinone oxidoreductase    | 2.0960  | 0.0359 |
| BAU10_20520 | <i>artM</i>     | arginine ABC transporter permease ArtM                      | -2.2434 | 0.0052 |
| BAU10_20535 | <i>artP</i>     | arginine ABC transporter ATP-binding protein ArtP           | 4.1781  | 0.0001 |
| BAU10_20575 | <i>gucD</i>     | aldehyde dehydrogenase family protein                       | 3.2429  | 0.0093 |
| BAU10_20590 | <i>Dred_242</i> | NADH:flavin oxidoreductase                                  | -2.7967 | 0.0000 |
| BAU10_20655 | <i>hmrR</i>     | putative transcriptional regulator                          | 4.0683  | 0.0494 |
| BAU10_20670 | <i>paaF</i>     | gamma-carboxygeranyl-CoA hydratase                          | 2.0512  | 0.0050 |
| BAU10_20710 | <i>yciC</i>     | cobalamin biosynthesis protein CobW                         | 0.4935  | 0.0340 |
| BAU10_20875 | --              | hypothetical protein                                        | 2.4797  | 0.0000 |
| BAU10_20890 | <i>cspA</i>     | cold shock transcriptional regulator CspA                   | -6.7814 | 0.0000 |
| BAU10_20935 | <i>ypeB</i>     | Putative cytoplasmic protein                                | -3.2725 | 0.0340 |
| BAU10_20980 | --              | cation diffusion facilitator family transporter             | -2.7523 | 0.0000 |
| BAU10_21015 | <i>HI_349</i>   | DPS family protein                                          | 2.5533  | 0.0000 |
| BAU10_21045 | <i>mak2</i>     | response regulator                                          | -3.0482 | 0.0003 |
| BAU10_21050 | <i>tolC</i>     | TolC family protein                                         | -2.4639 | 0.0014 |
| BAU10_21060 | <i>abcE</i>     | ATP-binding cassette domain-containing protein              | -2.3864 | 0.0011 |
| BAU10_21080 | --              | Alternative ribosome-rescue factor A                        | 2.1225  | 0.0119 |
| BAU10_21085 | <i>cspE</i>     | Cold shock protein CspE                                     | -2.2117 | 0.0000 |
| BAU10_21090 | --              | YaeQ protein                                                | -2.7832 | 0.0000 |
| BAU10_21145 | <i>MT-CO3</i>   | cytochrome c oxidase, subunit III                           | -3.6509 | 0.0079 |
| BAU10_21250 | --              | GFA family protein                                          | 2.9640  | 0.0465 |
| BAU10_21330 | --              | hypothetical protein                                        | 2.3173  | 0.0001 |
| BAU10_21385 | --              | hypothetical protein                                        | 4.0032  | 0.0000 |
| BAU10_21510 | --              | hypothetical protein                                        | -2.4733 | 0.0008 |
| BAU10_21680 | <i>exbB</i>     | TonB system transport protein ExbB                          | 16.5161 | 0.0007 |
| BAU10_21720 | --              | hypothetical protein                                        | -2.7792 | 0.0000 |
| BAU10_21845 | <i>wcaJ</i>     | undecaprenyl-phosphate glucose phosphotransferase           | 3.4286  | 0.0021 |
| BAU10_21860 | <i>etk</i>      | polysaccharide biosynthesis tyrosine autokinase             | 2.1874  | 0.0179 |
| BAU10_21865 | --              | capsular biosynthesis protein                               | 2.6390  | 0.0345 |
| BAU10_21950 | --              | transcriptional regulator                                   | 2.4752  | 0.0000 |
| BAU10_22015 | <i>kdpD</i>     | DUF48 domain-containing protein                             | -2.7577 | 0.0000 |
| BAU10_22060 | --              | putative secreted calcium-binding protein                   | 2.8672  | 0.0000 |
| BAU10_22065 | <i>csgD</i>     | helix-turn-helix transcriptional regulator                  | 2.8882  | 0.0000 |
| BAU10_22085 | <i>yeaC</i>     | MoxR family ATPase                                          | 2.0143  | 0.0000 |
| BAU10_22110 | --              | hypothetical protein BAU0_220                               | 2.0936  | 0.0000 |
| BAU10_22220 | <i>viaW</i>     | DUF3302 domain-containing protein                           | 2.6039  | 0.0000 |
| BAU10_22345 | --              | spore coat protein U domain-containing protein              | -2.1710 | 0.0350 |
| BAU10_22360 | --              | spore coat protein U domain-containing protein              | -5.9541 | 0.0165 |
| BAU10_22405 | <i>phoP</i>     | response regulator transcription factor                     | -2.0438 | 0.0133 |
| BAU10_22455 | --              | membrane protein                                            | -2.5570 | 0.0000 |
| BAU10_22690 | <i>PA977</i>    | DMT family transporter                                      | -2.5618 | 0.0000 |

|             |             |                                                         |           |        |
|-------------|-------------|---------------------------------------------------------|-----------|--------|
| BAU10_22735 | --          | RDD family protein                                      | -2.1846   | 0.0008 |
| BAU10_22765 | <i>nfsB</i> | oxygen-insensitive NAD(P)H nitroreductase               | 2.1886    | 0.0000 |
| BAU10_22775 | <i>cgt</i>  | alpha-amylase                                           | 2.1720    | 0.0000 |
| BAU10_22780 | <i>dacC</i> | D-alanyl-D-alanine carboxypeptidase                     | 2.2723    | 0.0017 |
| BAU10_22875 | --          | hypothetical protein                                    | 2.8195    | 0.0474 |
| BAU10_22895 | <i>yjiG</i> | membrane protein                                        | -2.0751   | 0.0000 |
| BAU10_22900 | <i>yjiH</i> | membrane protein                                        | -2.5781   | 0.0000 |
| BAU10_23080 | --          | TRAP transporter small permease                         | -         | 0.0326 |
|             |             |                                                         | 1036.6667 |        |
| BAU10_23240 | <i>yvcR</i> | ABC transporter ATP-binding protein                     | 2.2777    | 0.0001 |
| BAU10_23290 | <i>ahpC</i> | alkyl hydroperoxide reductase c22 protein               | 7.0703    | 0.0000 |
| BAU10_23295 | <i>ahpF</i> | alkyl hydroperoxide reductase subunit F                 | 7.0011    | 0.0000 |
| BAU10_23330 | --          | MFS transporter                                         | -2.0616   | 0.0000 |
| BAU10_23380 | --          | hypothetical protein                                    | -2.0597   | 0.0351 |
| BAU10_23455 | --          | mechanosensitive ion channel family protein             | -2.1578   | 0.0014 |
| BAU10_23595 | --          | hypothetical protein                                    | -4.3119   | 0.0481 |
| BAU10_23660 | --          | membrane protein                                        | 2.0012    | 0.0000 |
| BAU10_23665 | <i>yhcG</i> | putative ABC transporter ATP-binding protein            | 2.5577    | 0.0000 |
| BAU10_23670 | --          | putative transcriptional regulator, GntR family protein | 2.0357    | 0.0000 |
| BAU10_23750 | --          | acyltransferase family protein                          | -2.7851   | 0.0000 |
| BAU10_23915 | --          | lactoylglutathione lyase                                | 2.4745    | 0.0021 |
| BAU10_24180 | <i>rplJ</i> | 50S ribosomal protein L0                                | 2.1816    | 0.0000 |
| BAU10_24185 | <i>rplL</i> | 50S ribosomal protein L7/L2                             | 2.1580    | 0.0000 |
| BAU10_24195 | <i>rpoC</i> | DNA-directed RNA polymerase beta' subunit               | 2.0551    | 0.0000 |
| BAU10_24265 | <i>cadB</i> | lysine:cadaverine antiporter                            | 5.8960    | 0.0000 |
| BAU10_24270 | <i>cadA</i> | lysine decarboxylase LdcC                               | 14.9709   | 0.0000 |

**Table S4** *Vibrio alginolyticus* proteins are up/down regulated significantly in *rraA* mutant  
Orange shade: Differentially expressed proteins mentioned in the article.

| id          | Symbol | Description                                                                               | P-FC    | FDR    |
|-------------|--------|-------------------------------------------------------------------------------------------|---------|--------|
| BAU10_07485 | --     | tandem-95 repeat protein                                                                  | -1.7441 | 0.0000 |
| BAU10_13890 | --     | ExeM/NucH family extracellular endonuclease                                               | 1.7721  | 0.0000 |
| BAU10_19610 | MJCS02 | hypothetical protein                                                                      | 3.9522  | 0.0000 |
| BAU10_19635 | Rep    | DNA helicase                                                                              | 4.3181  | 0.0000 |
| BAU10_24250 | PurH   | bifunctional phosphoribosylaminoimidazolecarboxamide formyltransferase/IMP cyclohydrolase | 1.8036  | 0.0000 |
| BAU10_19625 | MJ1519 | AAA family ATPase                                                                         | 4.3553  | 0.0000 |
| BAU10_01460 | GrcA   | formate acetyl transferase-related protein                                                | 2.7816  | 0.0000 |
| BAU10_19595 | --     | hypothetical protein                                                                      | 3.7495  | 0.0000 |
| BAU10_22630 | YbiW   | formate C-acetyltransferase/glycerol dehydratase family glycyl radical enzyme             | 1.6690  | 0.0000 |
| BAU10_19630 | --     | DEAD/DEAH box helicase                                                                    | 5.8480  | 0.0000 |
| BAU10_19605 | YqhH   | DEAD/DEAH box helicase                                                                    | 3.7493  | 0.0000 |
| BAU10_21165 | PgcA   | putative phosphomannomutase                                                               | 1.5919  | 0.0000 |
| BAU10_23290 | AhpC   | alkyl hydroperoxide reductase c22 protein                                                 | 2.3001  | 0.0000 |
| BAU10_09970 | PurF   | amidophosphoribosyltransferase                                                            | 1.5701  | 0.0000 |

|             |       |                                                                                      |          |        |
|-------------|-------|--------------------------------------------------------------------------------------|----------|--------|
| BAU10_19615 | YqhH  | DEAD/DEAH box helicase family protein                                                | 4.0799   | 0.0000 |
| BAU10_09875 | BdlA  | methyl-accepting chemotaxis protein                                                  | 1.8975   | 0.0000 |
| BAU10_09250 | TsdA  | c-type cytochrome                                                                    | -2.5228  | 0.0000 |
| BAU10_02355 | PurL  | phosphoribosylformylglycinamide synthase                                             | 1.7737   | 0.0000 |
| BAU10_18760 | AslA  | arylsulfatase                                                                        | -8.0017  | 0.0000 |
| BAU10_23405 | PutA  | bifunctional proline dehydrogenase/L-glutamate gamma-semialdehyde dehydrogenase PutA | -1.9212  | 0.0000 |
| BAU10_09240 | TtrA  | tetrathionate reductase subunit TtrA                                                 | -1.8996  | 0.0000 |
| BAU10_19890 | YdeP  | FdhF/YdeP family oxidoreductase                                                      | 1.9954   | 0.0000 |
| BAU10_07495 | OprF  | putative outer membrane protein                                                      | 1.6721   | 0.0000 |
| BAU10_14275 | AcsA  | acetate--CoA ligase                                                                  | -3.4526  | 0.0000 |
| BAU10_17840 | NapA  | periplasmic nitrate reductase                                                        | -2.8279  | 0.0000 |
| BAU10_18285 | PagL  | 6-phospho-alpha-glucosidase                                                          | 2.0202   | 0.0000 |
| BAU10_07105 | --    | 4Fe-4S dicluster domain-containing protein                                           | 1.6285   | 0.0000 |
| BAU10_18570 | --    | 36 domain-containing protein                                                         | -3.4938  | 0.0000 |
| BAU10_04000 | ArgT  | amino acid ABC transporter, periplasmic amino acid-binding protein                   | -3.4162  | 0.0000 |
| BAU10_22340 | Cah   | carbonic anhydrase                                                                   | 1.9810   | 0.0000 |
| BAU10_06575 | AslA  | arylsulfatase A                                                                      | -9.2755  | 0.0000 |
| BAU10_07410 | AapJ  | amino acid ABC transporter, periplasmic amino acid-binding protein                   | -7.3739  | 0.0000 |
| BAU10_04925 | Ald   | alanine dehydrogenase                                                                | -3.3230  | 0.0000 |
| BAU10_07330 | Gdh   | NAD-glutamate dehydrogenase                                                          | -1.6971  | 0.0000 |
| BAU10_19675 | --    | ATP-binding protein                                                                  | 4.5993   | 0.0000 |
| BAU10_03955 | YeaG  | conserved hypothetical protein                                                       | -4.2176  | 0.0000 |
| BAU10_05315 | Hcp   | hydroxylamine reductase                                                              | 4.8154   | 0.0000 |
| BAU10_05995 | VIIY  | 4-hydroxyphenylpyruvate dioxygenase                                                  | -15.3302 | 0.0000 |
| BAU10_15390 | MppA  | ABC transporter substrate-binding protein                                            | -2.5219  | 0.0000 |
| BAU10_13835 | --    | 338 domain-containing protein                                                        | -2.9127  | 0.0000 |
| BAU10_17905 | OmpA2 | outer membrane protein A                                                             | -4.9727  | 0.0000 |
| BAU10_06570 | --    | haloacid dehalogenase-like hydrolase                                                 | -3.7842  | 0.0000 |
| BAU10_17045 | FusA  | elongation factor G                                                                  | -2.7093  | 0.0000 |
| BAU10_19380 | YeiE  | transcriptional regulator, LysR family                                               | 2.1174   | 0.0000 |
| BAU10_21315 | --    | redoxin family protein                                                               | -1.7703  | 0.0000 |
| BAU10_04735 | CitC  | citrate carrier                                                                      | -4.1566  | 0.0000 |
| BAU10_17235 | PurA2 | adenylosuccinate synthase                                                            | 1.5055   | 0.0000 |
| BAU10_07765 | LcrV  | VcrV                                                                                 | -1.8111  | 0.0000 |
| BAU10_05775 | PurT  | phosphoribosylglycinamide formyltransferase 2                                        | 1.9648   | 0.0000 |
| BAU10_01830 | PhoB  | DNA-binding response regulator PhoB                                                  | -1.5573  | 0.0000 |
| BAU10_13125 | ArgF  | Ornithine carbamoyltransferase                                                       | -2.8240  | 0.0000 |
| BAU10_21030 | --    | tandem-95 repeat protein                                                             | -7.5842  | 0.0000 |
| BAU10_13655 | ArgH  | argininosuccinate lyase                                                              | -1.7790  | 0.0000 |
| BAU10_20365 | YghX  | dienelactone hydrolase family protein                                                | -12.0281 | 0.0000 |
| BAU10_19425 | FadL  | outer membrane protein transport protein                                             | -1.9397  | 0.0000 |
| BAU10_13665 | ArgB  | acetylglutamate kinase                                                               | -3.8206  | 0.0000 |
| BAU10_05930 | DapA  | dihydrodipicolinate synthase family protein                                          | -15.7119 | 0.0000 |
| BAU10_20530 | ArtI  | transporter substrate-binding domain-containing protein                              | -1.8256  | 0.0000 |
| BAU10_15555 | --    | putative hyperosmotically inducible periplasmic protein                              | -1.7426  | 0.0000 |
| BAU10_19580 | --    | hypothetical protein                                                                 | 3.9053   | 0.0000 |

|             |         |                                                                                              |          |        |
|-------------|---------|----------------------------------------------------------------------------------------------|----------|--------|
| BAU10_05605 | PurC    | phosphoribosylaminoimidazolesuccinocarboxamide synthase                                      | 1.7744   | 0.0000 |
| BAU10_13850 | ArgD    | bifunctional N-succinyldiaminopimelate-aminotransferase/acetylornithine transaminase protein | -2.3294  | 0.0000 |
| BAU10_02375 | --      | succinylglutamate desuccinylase/aspartoacylase family protein                                | -1.9608  | 0.0000 |
| BAU10_06495 | OusX    | L-proline glycine betaine binding ABC transporter protein ProX                               | -3.8091  | 0.0000 |
| BAU10_13715 | Bfr     | bacterioferritin                                                                             | -2.2358  | 0.0000 |
| BAU10_20470 | PdhA    | component subunit alpha                                                                      | -12.1720 | 0.0000 |
| BAU10_05985 | OppA    | peptide ABC transporter substrate-binding protein                                            | -24.4826 | 0.0000 |
| BAU10_03820 | GuaB    | inosine monophosphate dehydrogenase-related protein                                          | -2.1065  | 0.0000 |
| BAU10_22890 | --      | putative carboxypeptidase G2                                                                 | -1.6018  | 0.0000 |
| BAU10_01900 | AceA    | isocitrate lyase                                                                             | -4.9185  | 0.0000 |
| BAU10_04720 | OadA1   | oxaloacetate decarboxylase alpha subunit                                                     | 1.6454   | 0.0000 |
| BAU10_20230 | --      | protein of avirulence locus                                                                  | 1.7055   | 0.0000 |
| BAU10_07740 | BcsP31  | immunogenic protein                                                                          | -10.2306 | 0.0000 |
| BAU10_08755 | --      | imelysin family protein                                                                      | -4.2013  | 0.0000 |
| BAU10_11050 | --      | histidine kinase                                                                             | -1.8838  | 0.0000 |
| BAU10_12545 | SerA    | phosphoglycerate dehydrogenase                                                               | 1.7301   | 0.0001 |
| BAU10_20775 | YcjY    | dienelactone hydrolase                                                                       | -3.2186  | 0.0001 |
| BAU10_20625 | MmsB    | 3-hydroxyisobutyrate dehydrogenase                                                           | -10.5408 | 0.0001 |
| BAU10_03950 | VP0986  | YeaH/YhbH family protein                                                                     | -5.2404  | 0.0001 |
| BAU10_20290 | PrkC    | serine/threonine protein kinase                                                              | 3.4685   | 0.0001 |
| BAU10_07125 | FdhB1   | formate dehydrogenase, iron-sulfur subunit                                                   | 1.5122   | 0.0001 |
| BAU10_20285 | TagH    | type VI secretion system-associated FHA domain protein TagH                                  | 3.5839   | 0.0001 |
| BAU10_18690 | HgbA    | TonB-dependent siderophore receptor                                                          | -32.7301 | 0.0001 |
| BAU10_19600 | --      | AAA family ATPase                                                                            | 4.0050   | 0.0001 |
| BAU10_10505 | --      | hypothetical protein                                                                         | -2.0017  | 0.0001 |
| BAU10_22065 | CsgD    | helix-turn-helix transcriptional regulator                                                   | 3.4178   | 0.0001 |
| BAU10_16450 | TnaA    | tryptophanase                                                                                | -2.2862  | 0.0001 |
| BAU10_13660 | ArgG    | argininosuccinate synthase                                                                   | -3.1358  | 0.0001 |
| BAU10_22015 | KdpD    | 8 domain-containing protein                                                                  | -20.3388 | 0.0001 |
| BAU10_14220 | AgmR    | putative two-component response regulator                                                    | -2.1553  | 0.0002 |
| BAU10_01395 | GltB    | glutamate synthase large subunit                                                             | 2.4507   | 0.0002 |
| BAU10_19585 | --      | 998 domain-containing protein                                                                | 3.7935   | 0.0002 |
| BAU10_14480 | --      | DUF2492 family protein                                                                       | 1.6707   | 0.0002 |
| BAU10_23570 | --      | putative amino acid ABC transporter, periplasmic amino acid-binding portion                  | -3.5284  | 0.0002 |
| BAU10_22320 | HI_1218 | putative L-lactate permease                                                                  | -3.1261  | 0.0002 |
| BAU10_05555 | --      | agglutination protein                                                                        | -2.6131  | 0.0002 |
| BAU10_06535 | EctC    | ectoine synthase                                                                             | -2.6362  | 0.0003 |
| BAU10_07575 | EO      | zinc-binding dehydrogenase                                                                   | -7.9447  | 0.0003 |
| BAU10_18320 | HI_0002 | putative long-chain-fatty-acid-CoA ligase                                                    | -13.2259 | 0.0003 |
| BAU10_07695 | PrpC    | 2-methylcitrate synthase                                                                     | -6.0115  | 0.0003 |
| BAU10_15270 | FadB    | fatty acid oxidation complex subunit alpha FadB                                              | -3.1491  | 0.0003 |
| BAU10_03945 | YcgB    | SpoVR family protein                                                                         | -4.8823  | 0.0003 |
| BAU10_23295 | AhpF    | alkyl hydroperoxide reductase subunit F                                                      | 1.8547   | 0.0004 |
| BAU10_00855 | MtlA    | PTS mannitol transporter subunit IICBA                                                       | -3.0284  | 0.0004 |
| BAU10_21950 | --      | transcriptional regulator                                                                    | 1.5788   | 0.0004 |
| BAU10_10465 | PurM    | Phosphoribosylformylglycinamide cyclo-ligase                                                 | 1.7316   | 0.0004 |

|             |        |                                                                 |          |        |
|-------------|--------|-----------------------------------------------------------------|----------|--------|
| BAU10_23920 | --     | lactoylglutathione lyase                                        | -3.4128  | 0.0004 |
| BAU10_20955 | --     | pterin-4-alpha-carbinolamine dehydratase                        | -2.1494  | 0.0004 |
| BAU10_03335 | FeoB   | Fe(2+) transporter permease subunit FeoB                        | -1.6223  | 0.0005 |
| BAU10_07750 | YopD   | type III secretion system translocon subunit YopD               | -1.8007  | 0.0005 |
| BAU10_03770 | CysM   | cysteine synthase/cystathionine beta-synthase family protein    | 25.1783  | 0.0005 |
| BAU10_17830 | NapC   | periplasmic nitrate reductase, cytochrome c-type protein        | -2.8553  | 0.0006 |
| BAU10_15265 | FadA   | acetyl-CoA C-acyltransferase FadA                               | -3.1764  | 0.0006 |
| BAU10_18435 | --     | putative acyl-CoA dehydrogenase                                 | -16.1518 | 0.0006 |
| BAU10_18450 | MmsA   | methylmalonate-semialdehyde dehydrogenase (acylating)           | -18.4429 | 0.0006 |
| BAU10_00140 | --     | hypothetical protein                                            | -2.2643  | 0.0007 |
| BAU10_05455 | FadE   | acyl-CoA dehydrogenase                                          | -2.7104  | 0.0007 |
| BAU10_14885 | PurK   | 5-(carboxyamino)imidazole ribonucleotide synthase               | 1.8527   | 0.0007 |
| BAU10_19765 | --     | late competence development ComFB family protein                | -2.7574  | 0.0007 |
| BAU10_05905 | AldH   | aldehyde dehydrogenase (NADP(+))                                | -21.9253 | 0.0007 |
| BAU10_22900 | YjiH   | membrane protein                                                | -1.9265  | 0.0008 |
| BAU10_08570 | VP1870 | TIGR01620 family protein                                        | -2.1882  | 0.0008 |
| BAU10_03995 | AotP   | amino acid ABC transporter, ATP-binding protein                 | -2.2322  | 0.0008 |
| BAU10_17355 | --     | aminotransferase, classes I and II superfamily                  | -2.0769  | 0.0008 |
| BAU10_05920 | --     | spermidine/putrescine ABC transporter substrate-binding protein | -32.8377 | 0.0008 |
| BAU10_07475 | --     | agglutination protein                                           | -3.5161  | 0.0008 |
| BAU10_19010 | NemA   | alkene reductase                                                | -3.6377  | 0.0009 |
| BAU10_06930 | LuxO   | sigma-54-dependent Fis family transcriptional regulator         | -4.9724  | 0.0009 |
| BAU10_04045 | --     | porin, putative                                                 | -1.9441  | 0.0009 |
| BAU10_14250 | FumC2  | aspartate ammonia-lyase                                         | -2.8060  | 0.0009 |
| BAU10_15385 | GsiA   | peptide ABC transporter, ATP-binding protein                    | -2.2631  | 0.0010 |
| BAU10_06615 | FlcR   | DeoR/GlpR transcriptional regulator                             | -2.3687  | 0.0010 |
| BAU10_09230 | TrbB   | 4Fe-4S dicluster domain-containing protein                      | -2.0327  | 0.0012 |
| BAU10_06505 | OusV   | ABC superfamily (glycine/betaine/proline transport protein)     | -3.2898  | 0.0012 |
| BAU10_20535 | ArtP   | arginine ABC transporter ATP-binding protein ArtP               | -1.7773  | 0.0012 |
| BAU10_21380 | FdhA   | formate dehydrogenase subunit alpha                             | 1.6571   | 0.0012 |
| BAU10_23225 | --     | DUF302 domain-containing protein, partial                       | -7.0318  | 0.0012 |
| BAU10_22010 | KdpE   | DNA-binding response regulator                                  | -12.1330 | 0.0013 |
| BAU10_17495 | YjjU   | patatin family protein                                          | -1.7107  | 0.0013 |
| BAU10_05960 | APP2   | aminopeptidase P family protein                                 | -5.7270  | 0.0013 |
| BAU10_20475 | PdhB   | component, beta subunit                                         | -22.7159 | 0.0014 |
| BAU10_20770 | YejY   | putative dienelactone hydrolase-related enzyme                  | -2.0327  | 0.0016 |
| BAU10_16345 | RimK   | ribosomal protein S6 modification protein                       | -3.6013  | 0.0016 |
| BAU10_15965 | BtuB   | TonB-dependent receptor                                         | -3.5821  | 0.0016 |
| BAU10_19590 | --     | DUF2075 domain-containing protein                               | -0.2509  | 0.0016 |
| BAU10_06190 | DhkJ   | hybrid sensor histidine kinase/response regulator               | -18.2082 | 0.0016 |
| BAU10_00635 | Mdh    | malate dehydrogenase                                            | -1.5483  | 0.0016 |
| BAU10_20640 | Acad8  | acyl-CoA dehydrogenase                                          | -14.6219 | 0.0017 |
| BAU10_20645 | MmsA   | CoA-acylating methylmalonate-semialdehyde dehydrogenase         | -13.3064 | 0.0018 |
| BAU10_19620 | --     | hypothetical protein                                            | 4.3290   | 0.0023 |
| BAU10_17115 | --     | hypothetical protein                                            | -1.7344  | 0.0027 |
| BAU10_20500 | HSP31  | glutamine amidotransferase domain-containing protein            | -1.8183  | 0.0028 |
| BAU10_16405 | --     | TAXI family TRAP transporter solute-binding subunit             | -2.9721  | 0.0031 |

|             |         |                                                          |          |        |
|-------------|---------|----------------------------------------------------------|----------|--------|
| BAU10_18445 | ThlA    | thiolase family protein                                  | -7.4099  | 0.0032 |
| BAU10_08860 | --      | glycine cleavage system regulatory protein               | -2.3548  | 0.0033 |
| BAU10_24245 | PurD    | phosphoribosylamine--glycine ligase                      | 1.6200   | 0.0033 |
| BAU10_18335 | --      | ABC transporter substrate-binding protein                | -17.7668 | 0.0034 |
| BAU10_23400 | --      | 1-pyrroline-5-carboxylate dehydrogenase                  | -2.1500  | 0.0034 |
| BAU10_22775 | Cgt     | alpha-amylase                                            | -0.3300  | 0.0035 |
| BAU10_07935 | --      | putative type III export apparatus protein NosA          | -2.2118  | 0.0038 |
| BAU10_23740 | --      | putative inner membrane protein                          | -2.0627  | 0.0039 |
| BAU10_02075 | YrbD    | sodium/alanine symporter                                 | -4.3789  | 0.0040 |
| BAU10_05260 | MdtA    | putative periplasmic linker protein                      | -2.1790  | 0.0044 |
| BAU10_06265 | SlI1178 | hypothetical protein                                     | -1.6318  | 0.0045 |
| BAU10_13930 | MotX    | sodium-type polar flagellar protein MotX                 | -1.8104  | 0.0045 |
| BAU10_06935 | --      | Hpt domain-containing protein                            | -3.3227  | 0.0047 |
| BAU10_16310 | --      | putative outer membrane protein                          | -3.7629  | 0.0050 |
| BAU10_07480 | Pal     | putative outer membrane protein                          | -6.6243  | 0.0051 |
| BAU10_20095 | CtpH    | methyl-accepting chemotaxis protein                      | -3.5672  | 0.0052 |
| BAU10_20810 | SAR0107 | putative AraC-type regulatory protein                    | 1.6362   | 0.0056 |
| BAU10_15210 | IbpA    | 16 kDa heat shock protein A                              | -2.1338  | 0.0056 |
| BAU10_16250 | --      | energy transducer TonB                                   | -1.6298  | 0.0057 |
| BAU10_01540 | ZraR    | sigma-54 dependent transcriptional regulator             | 1.9756   | 0.0058 |
| BAU10_18525 | AF_1420 | putative stomatin-like protein                           | -3.1418  | 0.0065 |
| BAU10_07690 | AcnD    | Fe/S-dependent 2-methylisocitrate dehydratase AcnD       | -2.5255  | 0.0065 |
| BAU10_20485 | EtfA    | electron transfer flavoprotein subunit alpha             | -46.3587 | 0.0071 |
| BAU10_05910 | VP1330  | 4-hydroxyproline epimerase                               | -23.1912 | 0.0073 |
| BAU10_20820 | PstS1   | ABC transporter, periplasmic substrate-binding protein   | -5.7650  | 0.0074 |
| BAU10_23895 | EmrK    | HlyD family secretion protein                            | 2.3888   | 0.0078 |
| BAU10_15975 | YejE    | putative peptide ABC transporter, permease protein       | 26.4426  | 0.0083 |
| BAU10_22395 | SodC    | superoxide dismutase                                     | -4.5901  | 0.0089 |
| BAU10_19370 | VPA0850 | YceI family protein                                      | -1.6565  | 0.0089 |
| BAU10_18475 | CLKR27  | 3-oxoacyl-ACP reductase                                  | -41.3703 | 0.0090 |
| BAU10_07680 | PA3568  | propionyl-CoA synthetase                                 | -5.3911  | 0.0092 |
| BAU10_18455 | ACAD8   | acyl-CoA dehydrogenase                                   | -7.5307  | 0.0093 |
| BAU10_07805 | --      | type III secretion system gatekeeper subunit SctW        | -8.0832  | 0.0093 |
| BAU10_19415 | --      | YgdI/YgdR family lipoprotein                             | -8.8876  | 0.0093 |
| BAU10_11100 | FadD15  | AMP-binding protein                                      | -5.3840  | 0.0102 |
| BAU10_22325 | IldD    | L-lactate dehydrogenase (cytochrome)                     | -2.1363  | 0.0104 |
| BAU10_03780 | --      | D-Tyr-tRNA <sup>Tyr</sup> deacylase                      | -1.5514  | 0.0104 |
| BAU10_05255 | --      | efflux RND transporter periplasmic adaptor subunit       | -1.6779  | 0.0108 |
| BAU10_06865 | --      | porin family protein                                     | -3.1478  | 0.0108 |
| BAU10_03130 | --      | putative nitrogen regulatory protein P-II family protein | -2.1618  | 0.0109 |
| BAU10_23690 | --      | family protein                                           | -1.7231  | 0.0111 |
| BAU10_08765 | --      | peptidase                                                | -1.5271  | 0.0111 |
| BAU10_02280 | RecN    | DNA repair protein RecN                                  | 1.8971   | 0.0117 |
| BAU10_19420 | VolA    | lipase                                                   | -1.6132  | 0.0119 |
| BAU10_05925 | LhpI    | ornithine cyclodeaminase family protein                  | -27.2307 | 0.0122 |
| BAU10_09545 | --      | ABC transporter substrate-binding protein                | -3.6896  | 0.0123 |
| BAU10_16330 | SpeA    | arginine decarboxylase                                   | -2.6041  | 0.0123 |



|             |           |                                                          |          |        |
|-------------|-----------|----------------------------------------------------------|----------|--------|
| BAU10_03595 | DctP      | TRAP-type C4-dicarboxylate transport system component    | -2.5898  | 0.0123 |
| BAU10_15060 | PheC      | transporter substrate-binding domain-containing protein  | -2.7494  | 0.0144 |
| BAU10_22005 | KtrA      | potassium transporter TrkA                               | -69.5120 | 0.0145 |
| BAU10_15710 | PA1727    | EAL domain-containing protein                            | -1.5150  | 0.0146 |
| BAU10_02980 | FlgB      | flagellar basal-body rod protein B                       | -2.2633  | 0.0157 |
| BAU10_15470 | YgbN      | low-affinity gluconate/H <sup>+</sup> symporter GntU     | -1.6767  | 0.0159 |
| BAU10_19055 | --        | repeat family protein                                    | -1.5385  | 0.0167 |
| BAU10_01875 | PA2428    | polyphosphate kinase 2                                   | -2.0195  | 0.0168 |
| BAU10_20390 | SdaC      | HAAAP family serine/threonine permease                   | -4.5495  | 0.0168 |
| BAU10_10345 | FlaB      | flagellin                                                | -1.5178  | 0.0168 |
| BAU10_01660 | HI_1126.1 | putative carbon starvation protein A                     | -1.6803  | 0.0172 |
| BAU10_07700 | PrpB      | carboxyphosphoenolpyruvate phosphonmutase                | -2.9005  | 0.0172 |
| BAU10_07585 | GlnQ      | amino acid ABC transporter ATP-binding protein           | -1.5427  | 0.0172 |
| BAU10_09280 | OppA      | ABC transporter substrate-binding protein                | -1.8582  | 0.0172 |
| BAU10_09125 | IsocI     | isochorismatase family protein                           | -4.5149  | 0.0175 |
| BAU10_21660 | HutZ      | heme utilization protein HutZ                            | -1.8607  | 0.0185 |
| BAU10_20320 | --        | putative glutathione S-transferase                       | -1.7590  | 0.0186 |
| BAU10_07880 | --        | type III chaperone                                       | -2.3297  | 0.0192 |
| BAU10_19695 | --        | hypothetical protein                                     | -0.2590  | 0.0193 |
| BAU10_23915 | --        | lactoylglutathione lyase                                 | -1.6184  | 0.0193 |
| BAU10_05560 | Csd       | cysteine desulfurase-like protein                        | -1.9288  | 0.0196 |
| BAU10_14190 | SodA      | superoxide dismutase, Mn                                 | -3.0809  | 0.0201 |
| BAU10_05665 | HutG      | formimidoylglutamase                                     | -2.8108  | 0.0203 |
| BAU10_16245 | ExbD2     | TonB system transport protein ExbD2                      | -1.9459  | 0.0203 |
| BAU10_14730 | Ggt       | gamma-glutamyltransferase                                | -1.5847  | 0.0206 |
| BAU10_23745 | NhaD      | sodium:proton antiporter NhaD                            | -4.4925  | 0.0213 |
| BAU10_07895 | YscJ      | putative type III secretion lipoprotein                  | -3.0359  | 0.0221 |
| BAU10_21785 | FatB      | siderophore ABC transporter substrate-binding protein    | -15.8201 | 0.0227 |
| BAU10_08760 | --        | c-type cytochrome                                        | -1.5903  | 0.0229 |
| BAU10_05660 | HutU      | urocanate hydratase                                      | -1.5046  | 0.0238 |
| BAU10_08470 | KilA      | DNA-binding protein                                      | 1.8854   | 0.0239 |
| BAU10_07565 | ArtI      | nickel transporter                                       | -4.6547  | 0.0239 |
| BAU10_19080 | PldA      | putative outer membrane phospholipase A precursor        | -1.6917  | 0.0240 |
| BAU10_00850 | MtlD      | mannitol-1-phosphate 5-dehydrogenase                     | -2.5264  | 0.0243 |
| BAU10_11095 | --        | Outer membrane receptor for Fe <sup>3+</sup> -dicitrate  | -8.4099  | 0.0245 |
| BAU10_07875 | VopS      | Va1686                                                   | -2.5539  | 0.0255 |
| BAU10_10085 | FadI      | acetyl-CoA C-acyltransferase FadI                        | -1.6720  | 0.0257 |
| BAU10_00485 | CysG      | uroporphyrinogen-III C-methyltransferase                 | -3.0070  | 0.0260 |
| BAU10_16465 | HI_0519   | nucleoside permease NupC                                 | -4.2488  | 0.0262 |
| BAU10_20490 | PA2953    | electron transfer flavoprotein-ubiquinone oxidoreductase | -3.3567  | 0.0274 |
| BAU10_13840 | AstD      | succinylglutamate 5-semialdehyde dehydrogenase           | -2.1715  | 0.0274 |
| BAU10_09745 | --        | SDR family oxidoreductase                                | -4.7444  | 0.0274 |
| BAU10_02405 | Crl       | transcriptional regulator Crl                            | -2.1408  | 0.0276 |
| BAU10_12030 | VP2494    | YacL family protein                                      | -2.3505  | 0.0277 |
| BAU10_23890 | OmpW      | outer membrane protein OmpW                              | -1.6112  | 0.0282 |
| BAU10_03000 | FlgF      | polar flagellar FlgF                                     | -2.4354  | 0.0292 |
| BAU10_14970 | YihG      | acyltransferase                                          | -1.5504  | 0.0298 |

|             |         |                                                     |             |        |
|-------------|---------|-----------------------------------------------------|-------------|--------|
| BAU10_23575 | DhkK    | hybrid sensor histidine kinase/response regulator   | -4.5388     | 0.0321 |
| BAU10_07110 | TorD    | putative formate dehydrogenase-specific chaperone   | 1.5704      | 0.0326 |
| BAU10_13200 | --      | LPS export ABC transporter periplasmic protein LptC | -1.5219     | 0.0326 |
| BAU10_20635 | YngF    | enoyl-CoA hydratase                                 | -22.1291    | 0.0336 |
| BAU10_13275 | YlaK    | PhoH family protein                                 | -3.2950     | 0.0336 |
| BAU10_17260 | DoeD    | aspartate aminotransferase family protein           | -3.4412     | 0.0344 |
| BAU10_18460 | PaaF    | enoyl-CoA hydratase                                 | -9.2620     | 0.0344 |
| BAU10_12815 | DavD    | NAD-dependent succinate-semialdehyde dehydrogenase  | 1.6731      | 0.0357 |
| BAU10_19330 | Gph     | HAD-IA family hydrolase                             | -1.5901     | 0.0376 |
| BAU10_14610 | HemD    | uroporphyrinogen-III synthase                       | -1.5015     | 0.0387 |
| BAU10_09065 | --      | EAL domain-containing protein                       | -4.0931     | 0.0391 |
| BAU10_14265 | --      | cyclic nucleotide-binding protein                   | -3.8032     | 0.0438 |
| BAU10_18305 | EtfB    | electron transfer flavoprotein, beta-subunit        | -21.9486    | 0.0473 |
| BAU10_11780 | --      | hypothetical protein                                | -1.8604     | 0.0477 |
| BAU10_10875 | RpoE    | putative RNA polymerase ECF-type sigma factor       | -2.9894     | 0.0477 |
| BAU10_18970 | CalB    | coniferyl aldehyde dehydrogenase                    | -1.7347     | 0.0478 |
| BAU10_05965 | OppF    | ATP-binding cassette domain-containing protein      | -12.5670    | 0.0488 |
| BAU10_23260 | --      | GNAT family N-acetyltransferase                     | -1.9485     | 0.0490 |
| BAU10_06000 | VC_1345 | 1,2-dioxygenase                                     | -11.0675    | 0.0491 |
| BAU10_23065 | RhmA    | aldolase                                            | -37636.7733 | 0.0493 |
